# Supplementary figures and images for: Electron transport through negatively curved nanographenes
Source: Royal Society of Chemistry journal article supplement (doi:10.1039/d5nr04033g), 2025-12-19

## 7-HBC-SMe

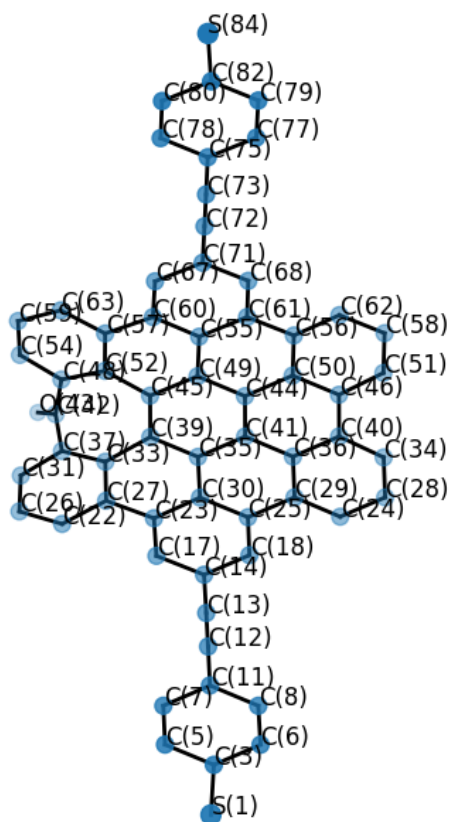

## HBC-SMe

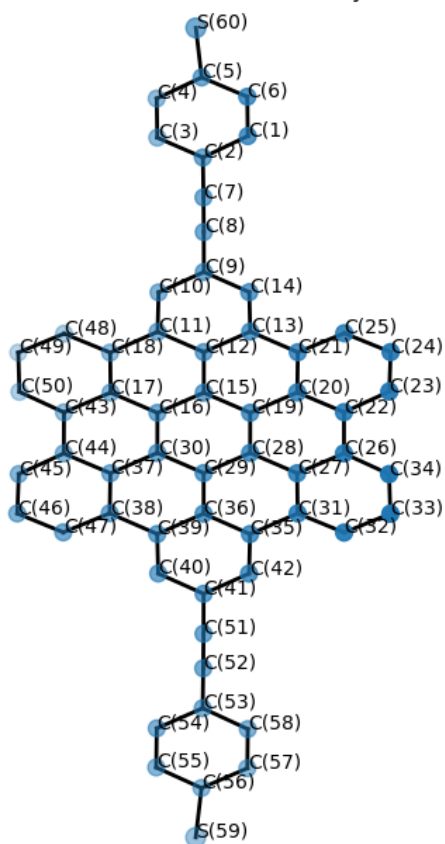

## 7-HBC-alk

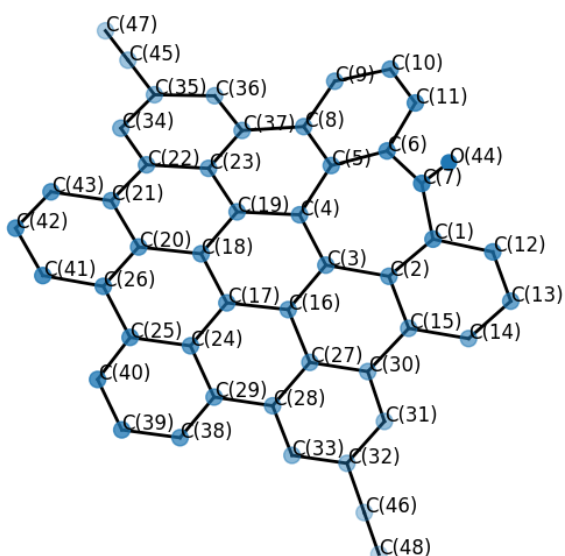

## HBC-alk

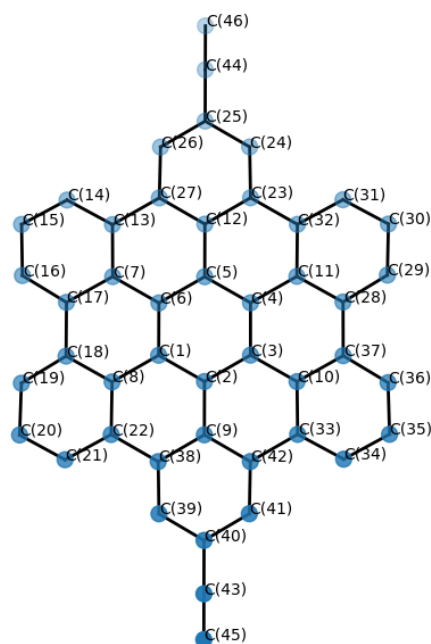

Supplement: d5nr04033g10.pdf [file d5nr04033g10.pdf]

(a)

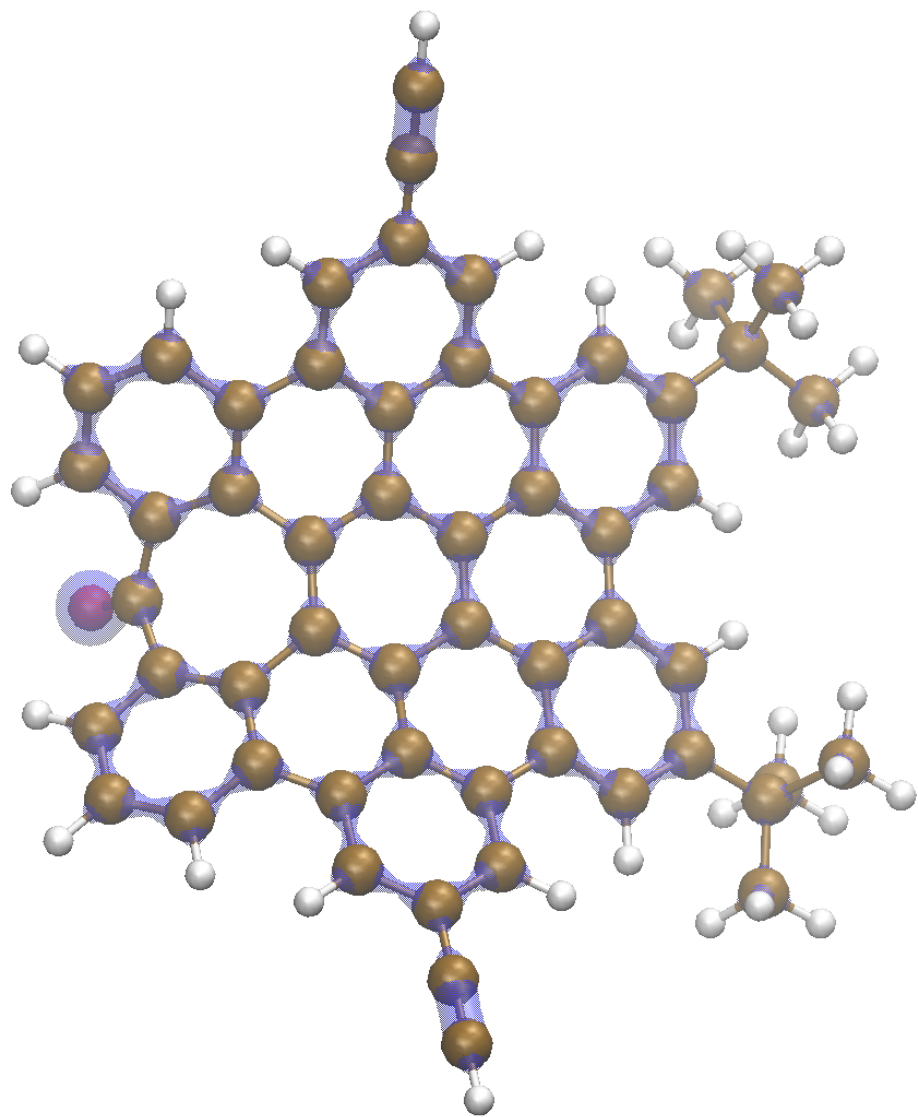

(b)

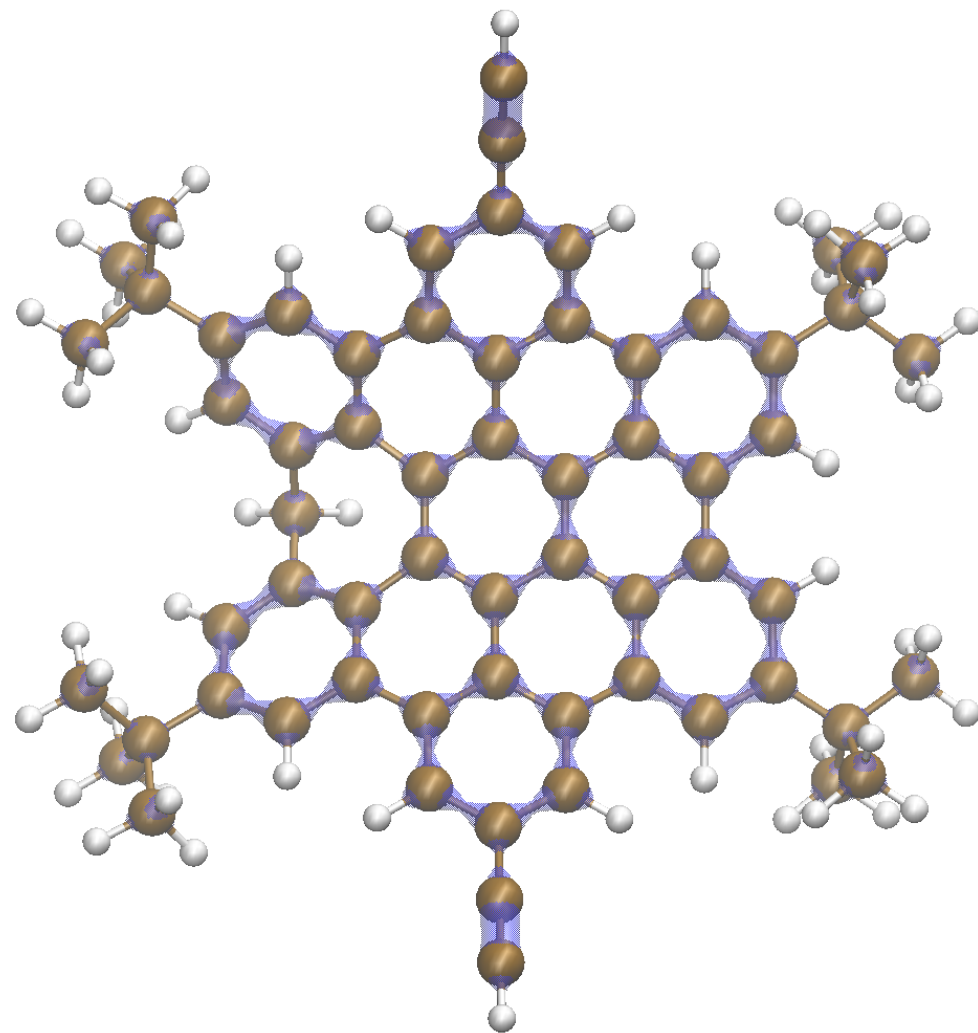

Supplement: d5nr04033g13.pdf [file d5nr04033g13.pdf]

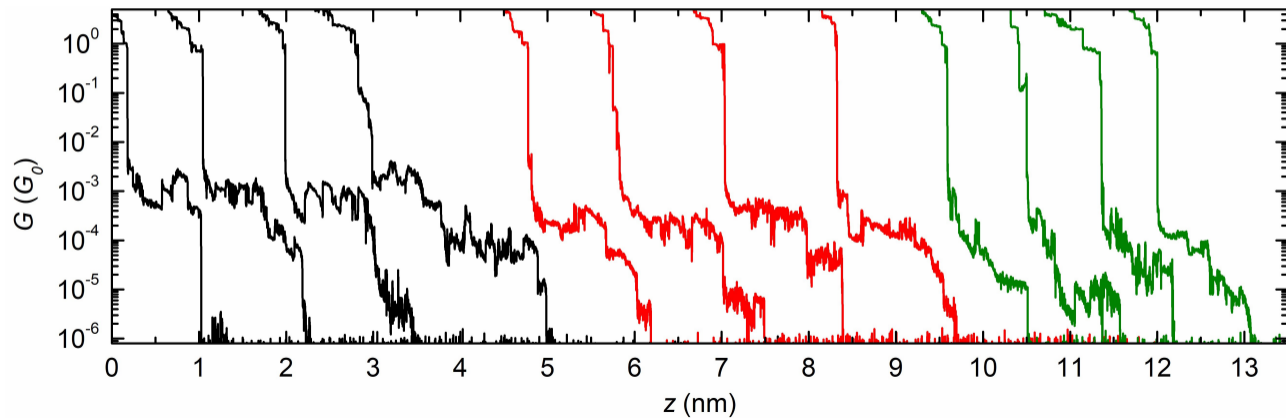

Supplement: d5nr04033g19.pdf [file d5nr04033g19.pdf]

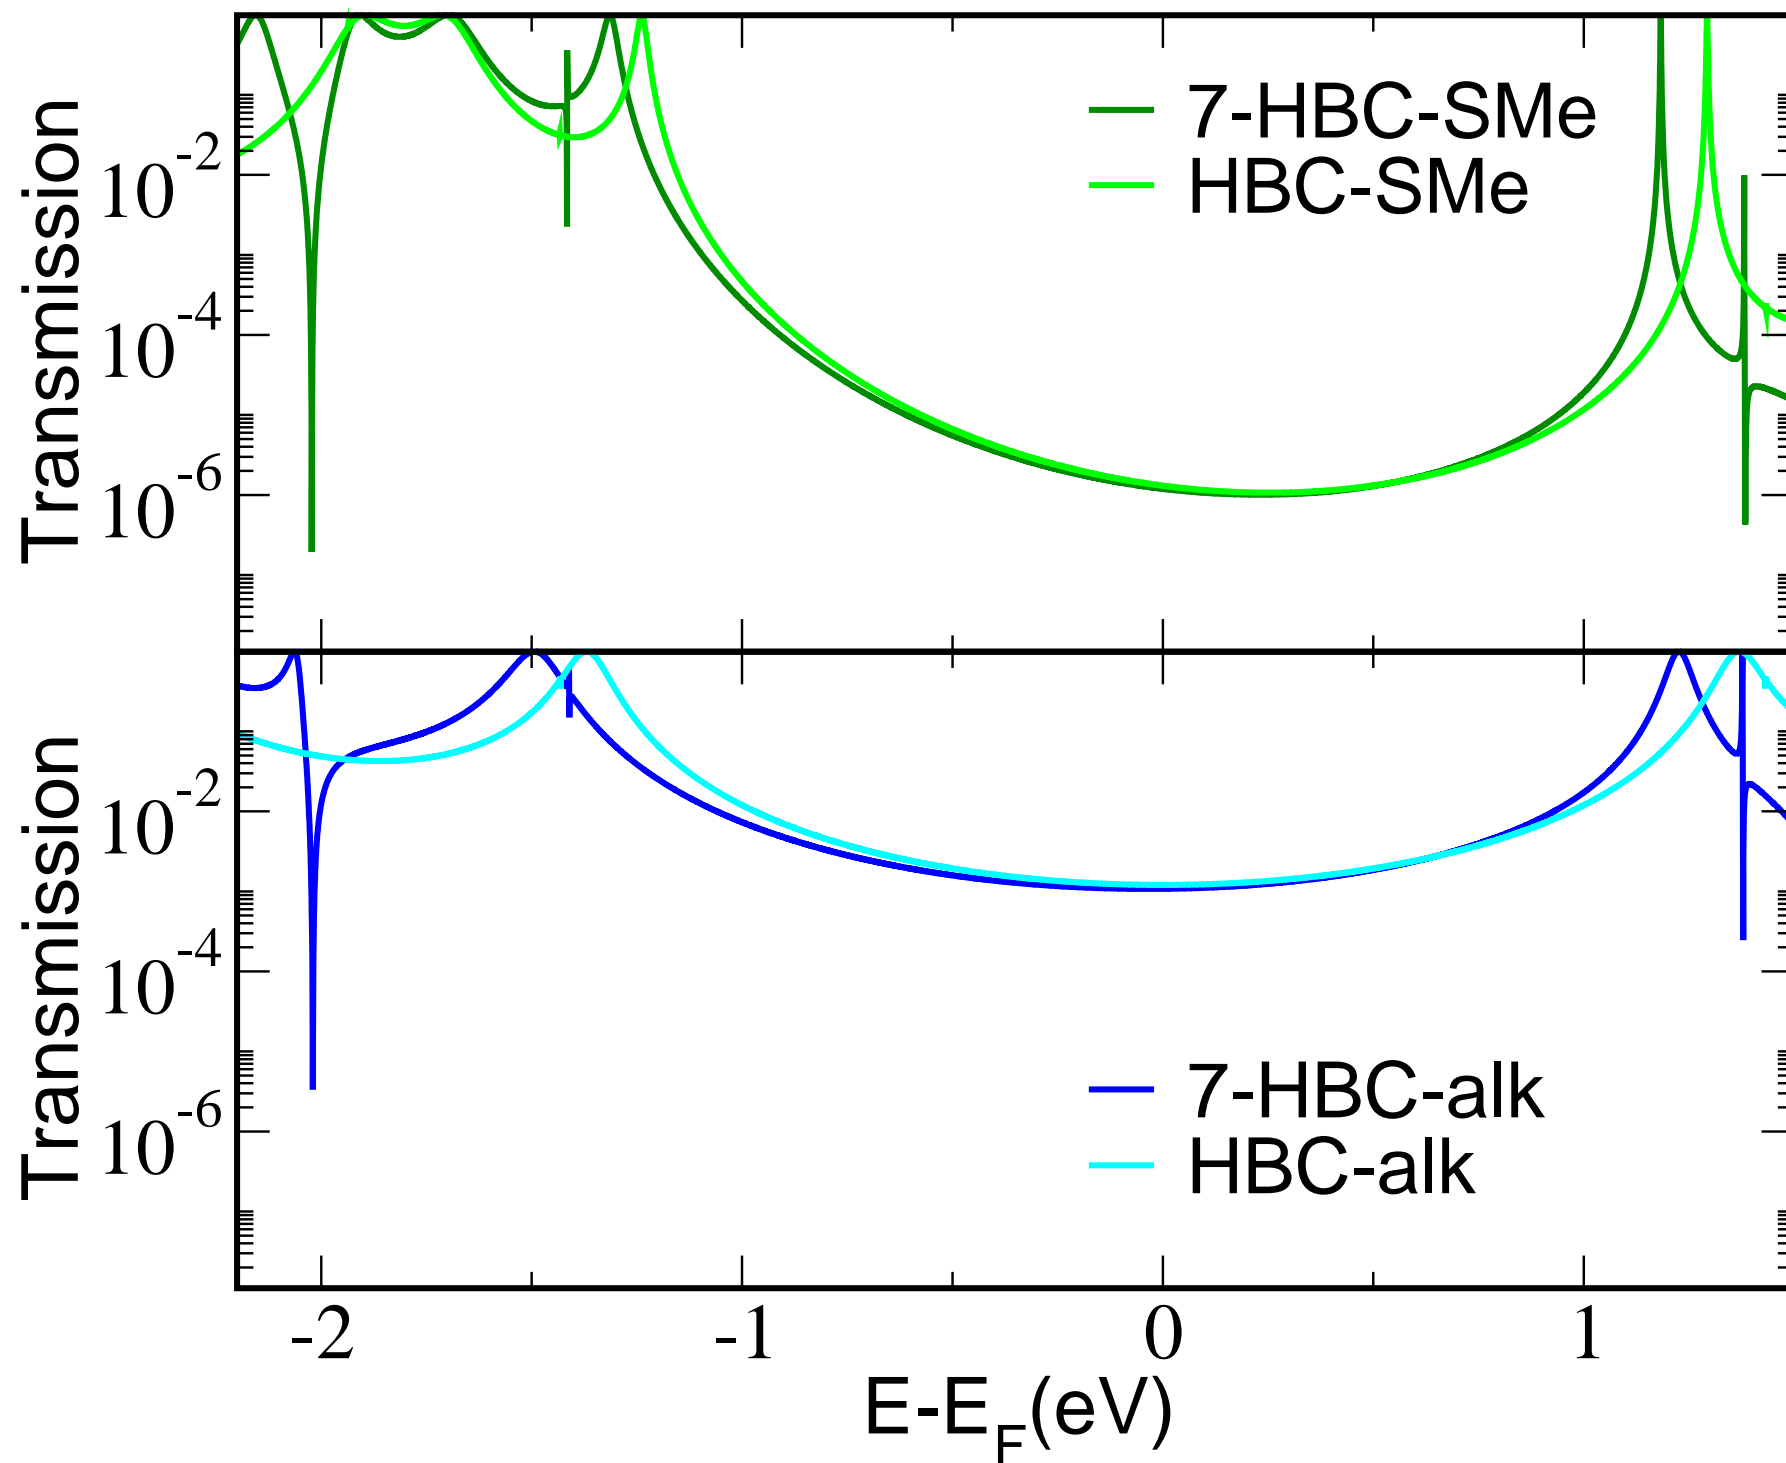

Supplement: d5nr04033g9.pdf [file d5nr04033g9.pdf]
